# Supplementary material for: Human mesenchymal stromal cells exert HGF dependent cytoprotective effects in a human relevant pre-clinical model of COPD
Source: PubMed Central journal article supplement (PMC5138599; doi:10.1038/srep38207), 2016-12-06
Supplement: srep38207-s1.pdf [file srep38207-s1.pdf]

## **Supplementary Data**

**Human mesenchymal stromal cells exert HGF dependent cytoprotective effects in a human relevant pre-clinical model of COPD.**

Helen Kennelly<sup>1</sup>, Bernard P. Mahon<sup>1</sup> and Karen English<sup>1</sup>

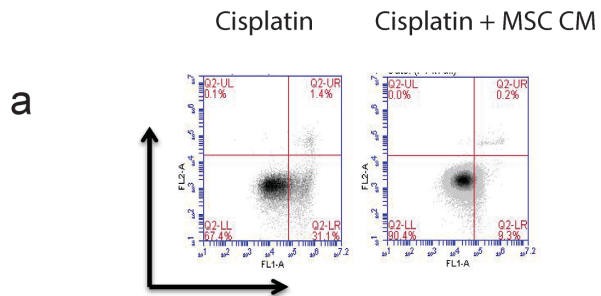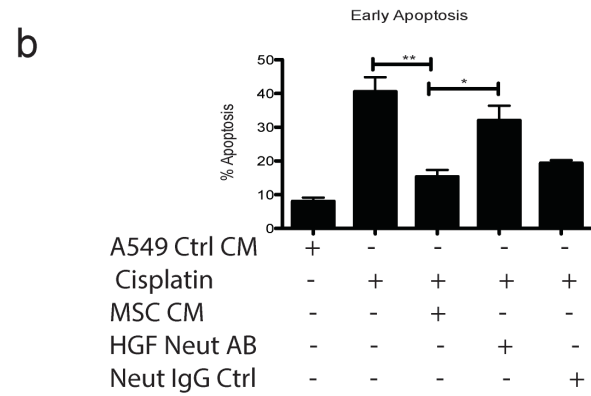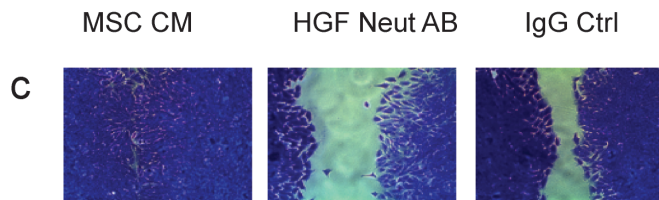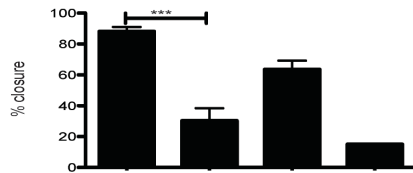

|               |   |   |   |   |
|---------------|---|---|---|---|
| MSC CM        | + | - | - | - |
| HGF Neut AB   | - | + | - | - |
| Neut IgG Ctrl | - | - | + | - |
| A549 Ctrl CM  | - | - | - | + |

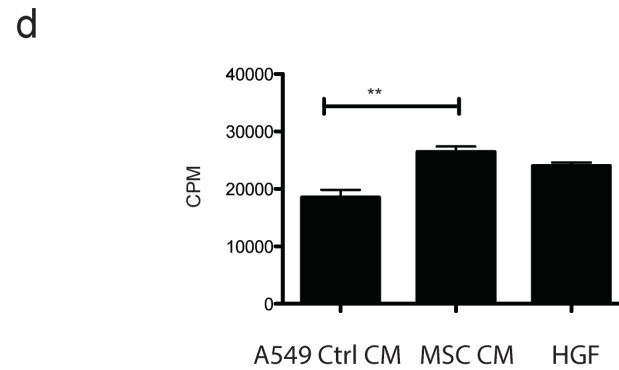

**Supplementary Figure 1. hMSC derived soluble factors protect against apoptosis and enhance wound healing *in vitro* in a HGF dependent manner.** For all assays  $1 \times 10^5$  A549 cells were seeded into a 24 well plate and cultured until confluent. For the apoptosis assay: 50  $\mu\text{g/ml}$  cisplatin was added to cells for 24 hours to induce apoptosis. MSC conditioned medium (CM) was generated by culturing control media with  $1 \times 10^5$  MSC overnight in a 24 well plate. HGF was inhibited through addition of a HGF neutralising antibody (5 $\mu\text{g/ml}$ ). CM was added to appropriate wells for 24 hours. Apoptosis was determined by flow cytometric measurement of annexin V and PI (A) and percentage of early apoptotic cells measured (Annexin V<sup>+</sup> PI<sup>-</sup>) (B). For the scratch assay, cells were scratched and conditioned media added. HGF was inhibited in MSC CM through addition of a neutralising antibody. After wound closure, cells were methanol fixed and stained with crystal violet and the percentage wound closure was calculated using Image J software (C). For the proliferation assay, cells were scratched and ctrl or MSC CM added. Recombinant HGF at 10 $\text{ng/ml}$  was added as a positive control. [<sup>3</sup>H] – Thymidine was added to each well and incubated for 2 days. After 2 days cells were lysed and combined with 2ml of  $\beta$ -scintillation counter liquid. Proliferation was measured as counts per minute (CPM). Data statistically analysed by ANOVA.  $p^* < 0.05$ ,  $p^{**} < 0.01$ ,  $p^{***} < 0.001$ . N=4 for all groups

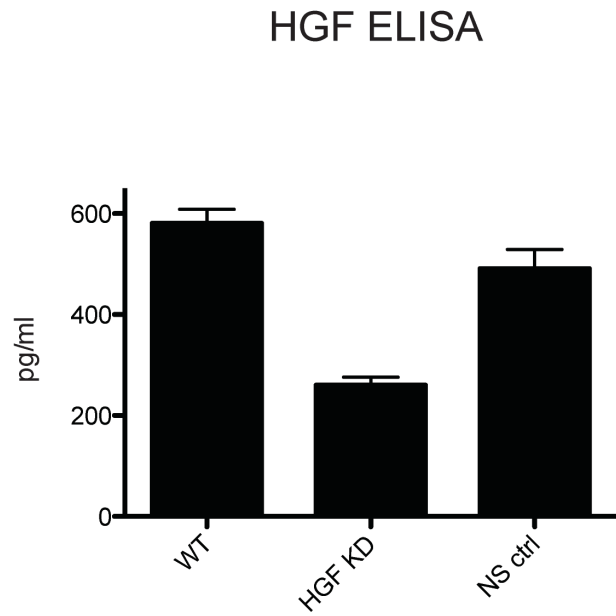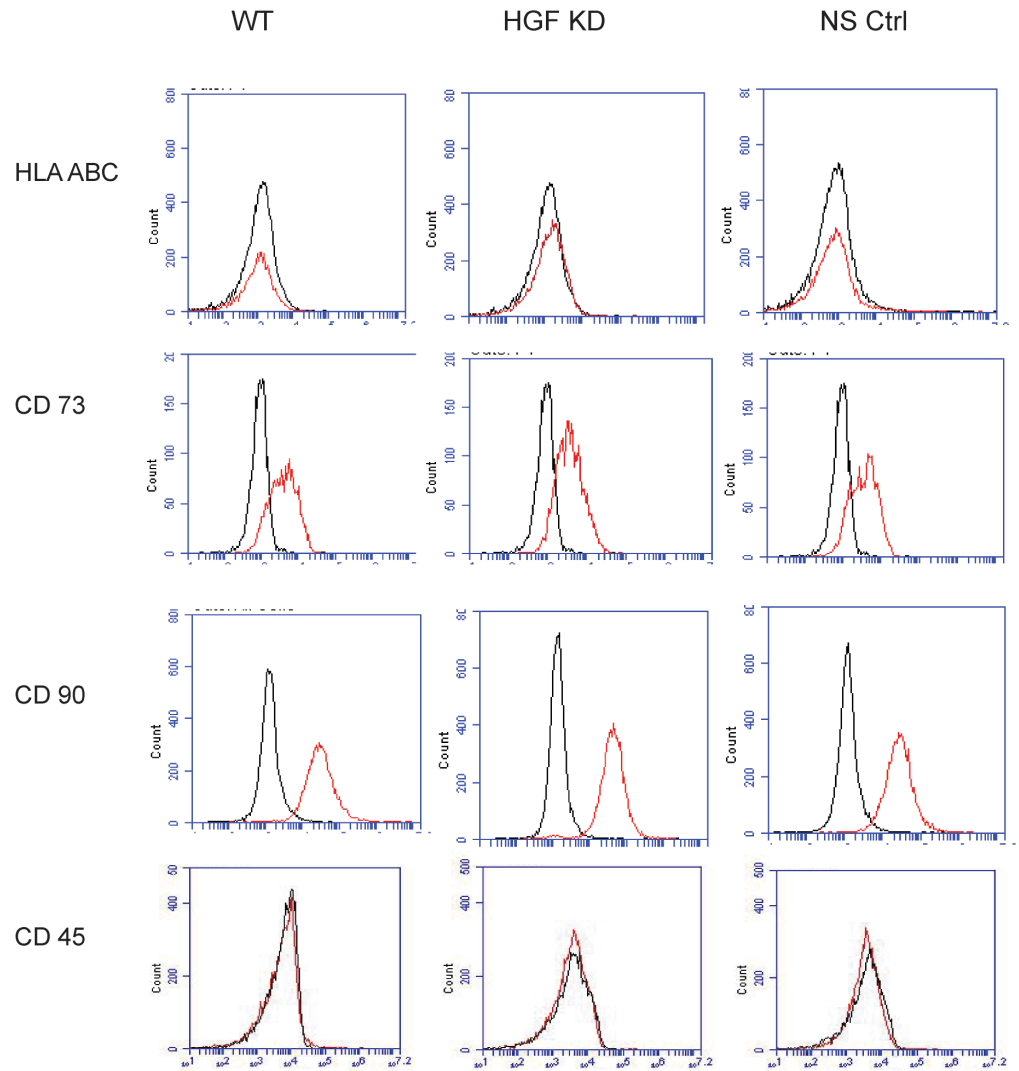

**Supplementary Figure 2. HGF KD Cell Characterisation.** HGF knock down was confirmed by using a human specific HGF ELISA. WT, KD and NS ctrl MSC supernatants were examined for expression of the HGF protein. Protein expression was calculated utilising a standard curve (A). All cells were characterised by looking at surface marker expression of a variety of cell surface markers against corresponding isotypes by flow cytometry (B).
